# Supplementary material for: α-Li2TiO3: a new ultrastable anode material for lithium-ion batteries
Source: Royal Society of Chemistry journal article supplement (doi:10.1039/d2dt03115a), 2022-01-01
Supplement: d2dt03115a1.pdf [file d2dt03115a1.pdf]

## $\alpha$ -Li<sub>2</sub>TiO<sub>3</sub>: A new ultra-stable anode material for lithium ion batteries

Yumin Kang, Yuting Xie, Fengli Su, Keshu Dai, Miao Shui\*, Jie Shu\*

The State Key Laboratory base of Novel Functional Materials and Preparation science;

The Faculty of Materials Science and Chemical Engineering, Ningbo Univ., Ningbo,

315211 P. R. China

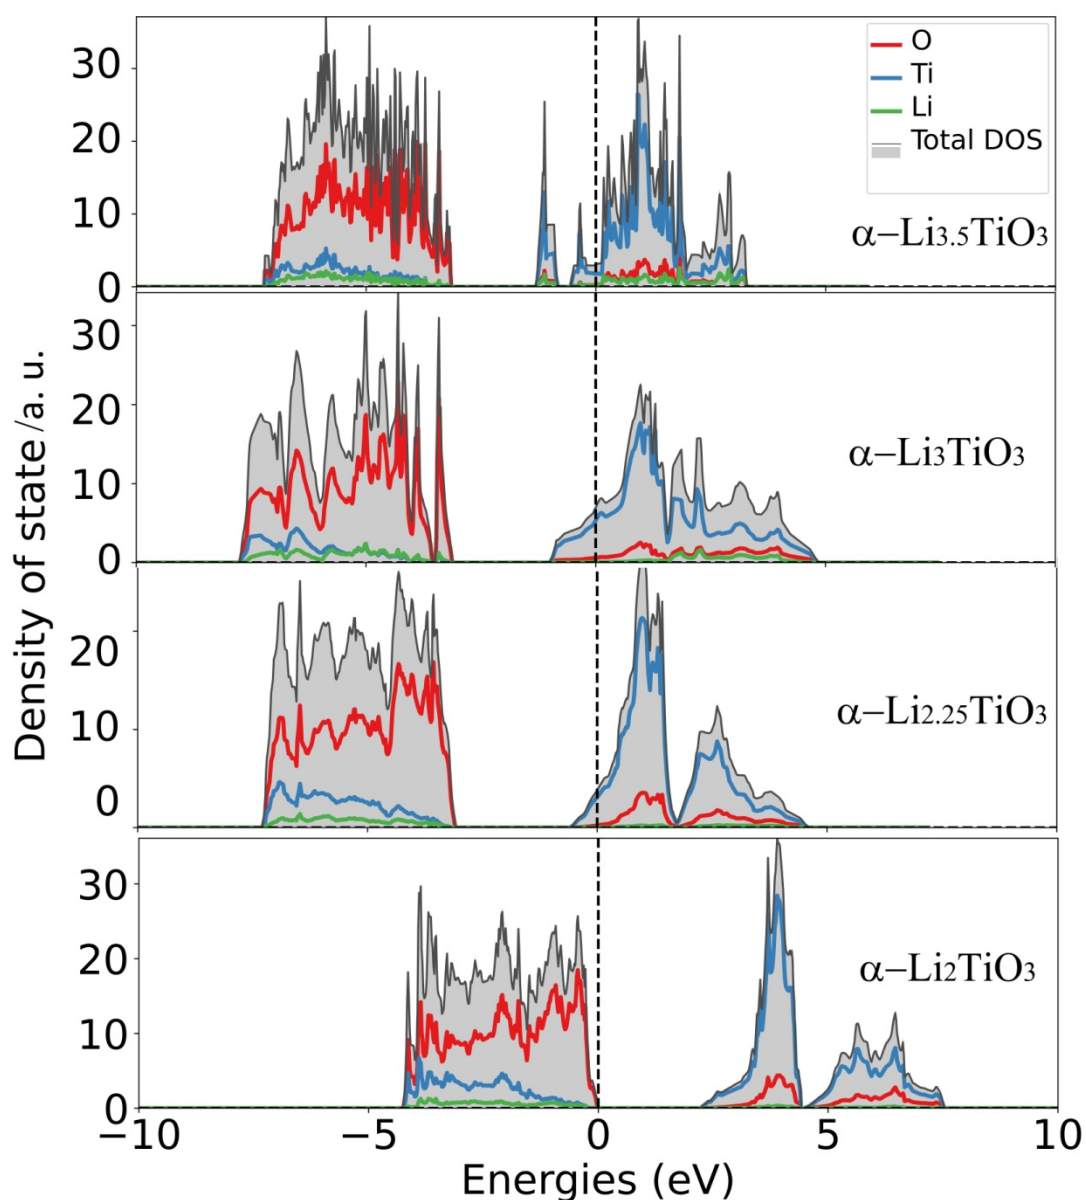

Fig. S1 The partial density of states for the ground state configuration of Li<sub>2+x</sub>TiO<sub>3</sub>, when x= 0, 0.25, 1.0 and 1.5

\* Correspondence author, E-mail: [shuimiao@nbu.edu.cn](mailto:shuimiao@nbu.edu.cn); [shujie@nbu.edu.cn](mailto:shujie@nbu.edu.cn); Tel: +86-574-87600787

| Structure                                                                              | $\beta$ -Li <sub>2</sub> TiO <sub>3</sub> | $\alpha$ -Li <sub>2</sub> TiO <sub>3</sub> |
|----------------------------------------------------------------------------------------|-------------------------------------------|-------------------------------------------|-------------------------------------------|-------------------------------------------|--------------------------------------------|
| Reversible Capacity<br>(mAh g <sup>-1</sup> )/Current<br>density (mA g <sup>-1</sup> ) | 200/100                                   | 153/1000                                  | 114/0.08C                                 | 13/0.2C                                   | 376/100                                    |
| Number of<br>cycles(n)                                                                 | 200                                       | 30                                        | 30                                        | 5                                         | 100                                        |
| Retention<br>rate(%)                                                                   | 97                                        | 95                                        | 95                                        | --                                        | 95                                         |
| rate performance                                                                       | 300/100                                   |                                           |                                           |                                           | 387 /0.15C                                 |
| Reversible capacity<br>(mAh g <sup>-1</sup> )/Current<br>density (mA g <sup>-1</sup> ) | 190/200                                   | ---                                       | ---                                       | ---                                       | 330/0.3C                                   |
|                                                                                        | 140/300                                   |                                           |                                           |                                           | 243/0.75C                                  |
|                                                                                        | 125/400                                   |                                           |                                           |                                           | 175/1.5C                                   |
|                                                                                        | 120/500                                   |                                           |                                           |                                           | 113/3C                                     |
|                                                                                        | 190/100                                   |                                           |                                           |                                           | 378/0.15C                                  |
| Electrolyte                                                                            | Non-aqueous                               | aqueous                                   | aqueous                                   | Non-<br>aqueous                           |                                            |
| Long cycle Capacity                                                                    | 177                                       | ---                                       | ---                                       | ---                                       | 312                                        |
| Long Cycle Number                                                                      | 500                                       | ---                                       | ---                                       | ---                                       | 400                                        |
| Reference                                                                              | [23]                                      | [20]                                      | [13]                                      | [18]                                      | This work                                  |

Tab. S1 A comparison of electrochemical performance between  $\alpha$ -Li<sub>2</sub>TiO<sub>3</sub> in this work and the related phase reported previously.
